# Supplementary material for: Chitosan Tubes Enriched with Fresh Skeletal Muscle Fibers for Primary Nerve Repair
Source: Hindawi journal article supplement (doi:10.1155/2018/9175248), 2018-06-13
Supplement: f1 [file 9175248.f1.pdf]

| factor              | repair |    |       | time   |    |       | repair * time |    |       |
|---------------------|--------|----|-------|--------|----|-------|---------------|----|-------|
|                     | F      | dF | P     | F      | dF | P     | F             | dF | P     |
| <b>ErbB1</b>        | 15.254 | 2  | 0.000 | 16.671 | 4  | 0.000 | 2.49          | 7  | 0.033 |
| <b>ErbB2</b>        | 39.186 | 2  | 0.000 | 28.479 | 4  | 0.000 | 9.121         | 7  | 0.000 |
| <b>ErbB3</b>        | 65.198 | 2  | 0.000 | 16.261 | 4  | 0.000 | 9.942         | 7  | 0.000 |
| <b>ErbB4</b>        | 32.770 | 2  | 0.000 | 50.926 | 4  | 0.000 | 5.568         | 7  | 0.056 |
| <b>soluble NRG1</b> | 22.407 | 2  | 0.000 | 50.770 | 4  | 0.000 | 8.517         | 7  | 0.000 |
| <b>NRG1 a</b>       | 18.345 | 2  | 0.000 | 41.473 | 4  | 0.000 | 5.230         | 7  | 0.000 |
| <b>NRG1 b</b>       | 22.407 | 2  | 0.000 | 50.770 | 4  | 0.000 | 8.51          | 7  | 0.000 |
| <b>NRG1 c</b>       | 14.513 | 2  | 0.000 | 22.873 | 4  | 0.000 | 2.226         | 7  | 0.053 |
| <b>S100</b>         | 32.807 | 2  | 0.000 | 24.346 | 4  | 0.000 | 3.214         | 7  | 0.010 |
| <b>p75</b>          | 35.778 | 2  | 0.000 | 6.861  | 4  | 0.000 | 4.597         | 7  | 0.001 |
| <b>GFAP</b>         | 26.718 | 2  | 0.000 | 11.616 | 4  | 0.000 | 4.154         | 7  | 0.002 |

**Figure S1**

For quantitative real time PCR data, the effect of repair (autograft *versus* chitosan *versus* muscle-in-tube), the effect of the time after injury and repair (1 *versus* 7 *versus* 14 *versus* 28 days) and the interaction between the two factors (repair \* time) were analyzed by two-way ANOVA test. Analysis of all genes showed highly significant main effects of repair and time. The interaction between the two factors is highly significant for most genes (dF = degrees of freedom, P = P-value).
